# Supplementary material
Source: PubMed Central journal article supplement (PMC2838289)
Supplement: supp_M109.058685_jbc.M109.058685-1.pdf [file supp_M109.058685_jbc.M109.058685-1.pdf]

# Supplemental Figure 1

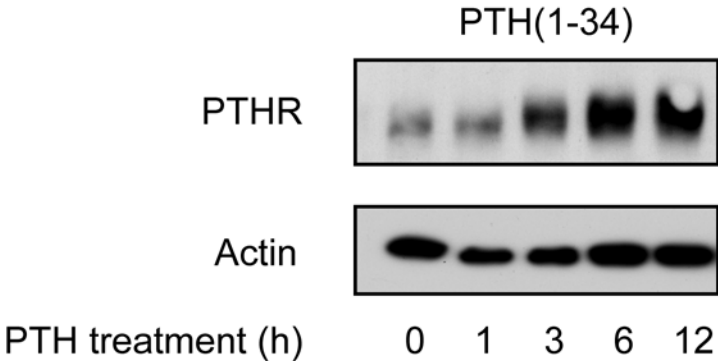

CHO cells stably expressing HA-PTHR were incubated with 200  $\mu$ M cycloheximide for 2 h and then cells were treated with 100 nM PTH(1-34) for the indicated times in the presence of cycloheximide. Subsequently, cells were lysed and proteins were separated by SDS-PAGE and blotted to PVDF membranes. PTHR was detected in Western blots with an anti-HA antibody.
